# Supplementary figures and images for: Axl receptor tyrosine kinase is a potential therapeutic target in renal cell carcinoma
Source: PubMed Central journal article supplement — Br J Cancer. 2015 Jul 16;113(4):616–25. doi: 10.1038/bjc.2015.237 (PMC4647683; doi:10.1038/bjc.2015.237), 2015-07-16

Fig S1

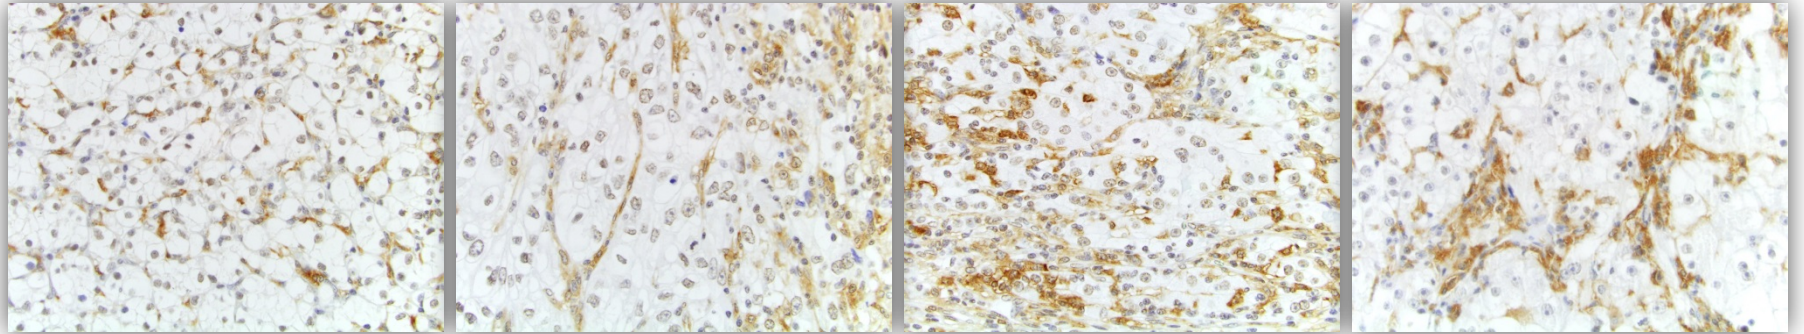

Fig S2

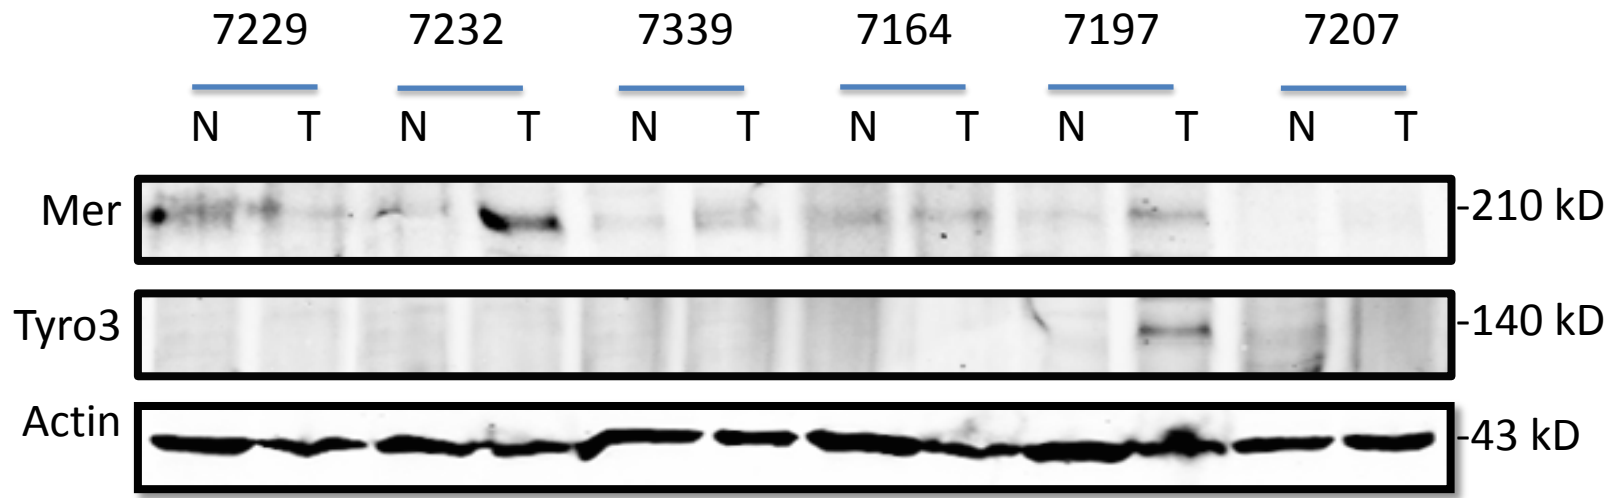

Fig S3

A

786-O, 40nM ctrl siRNA

786-O, 40nM Axl siRNA

HT29

Axl/DAPI

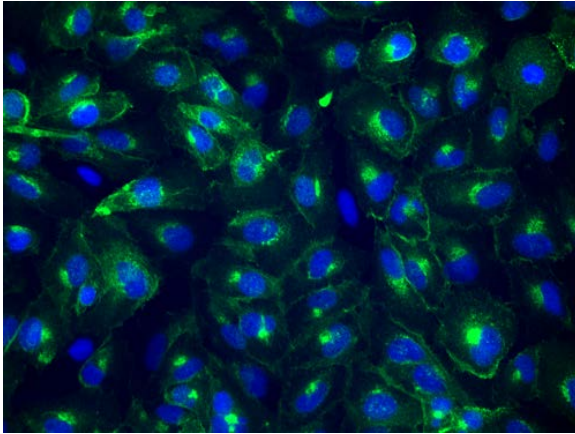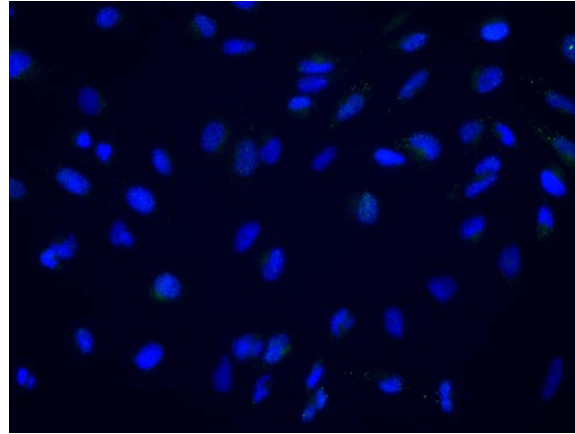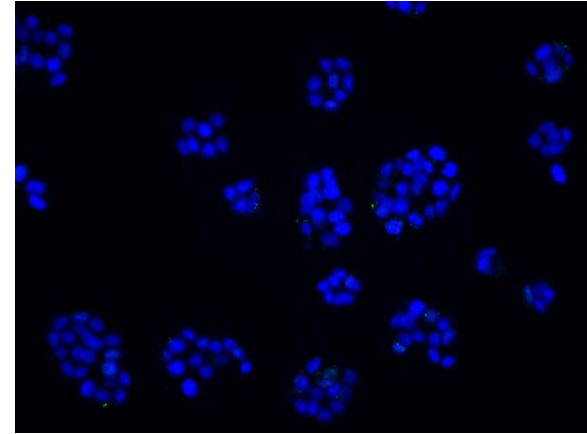

B

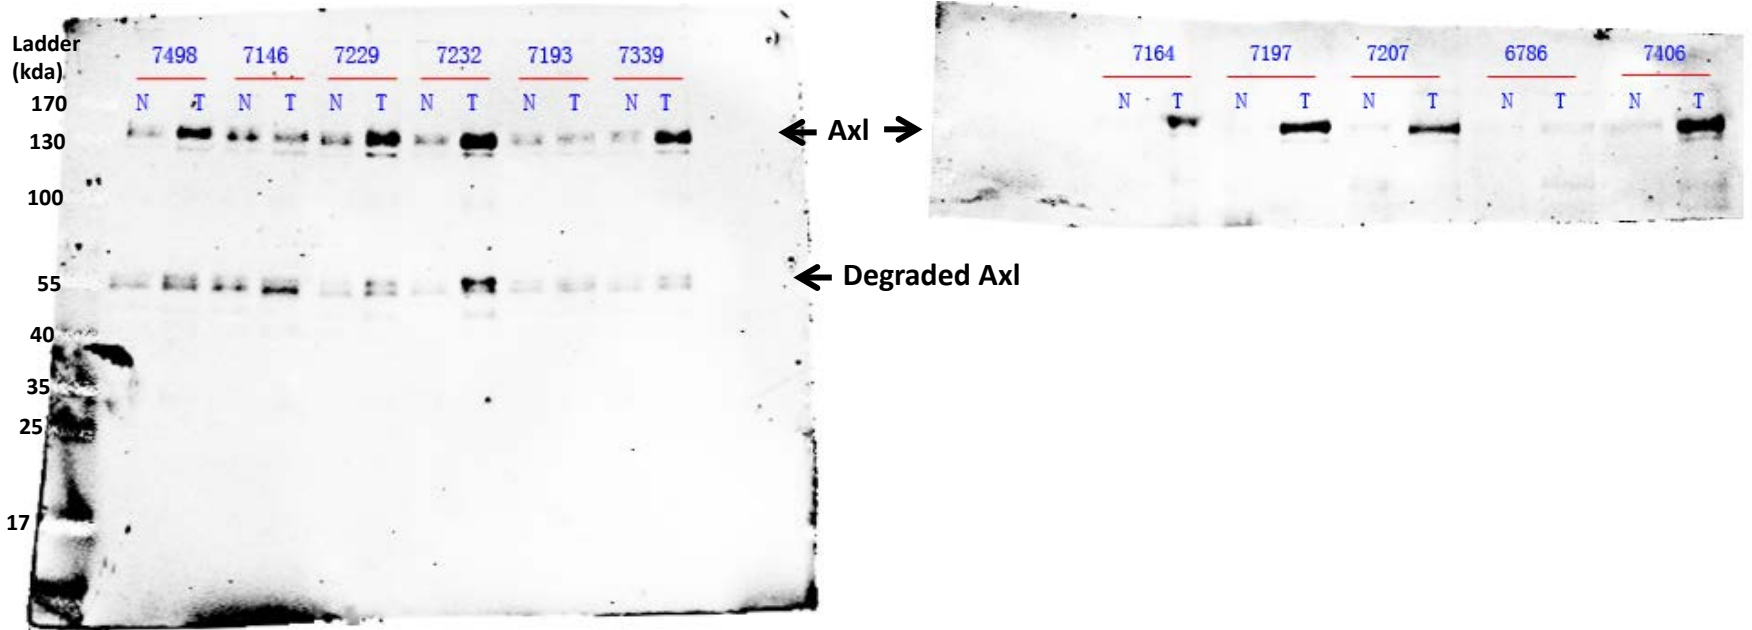

Fig S4

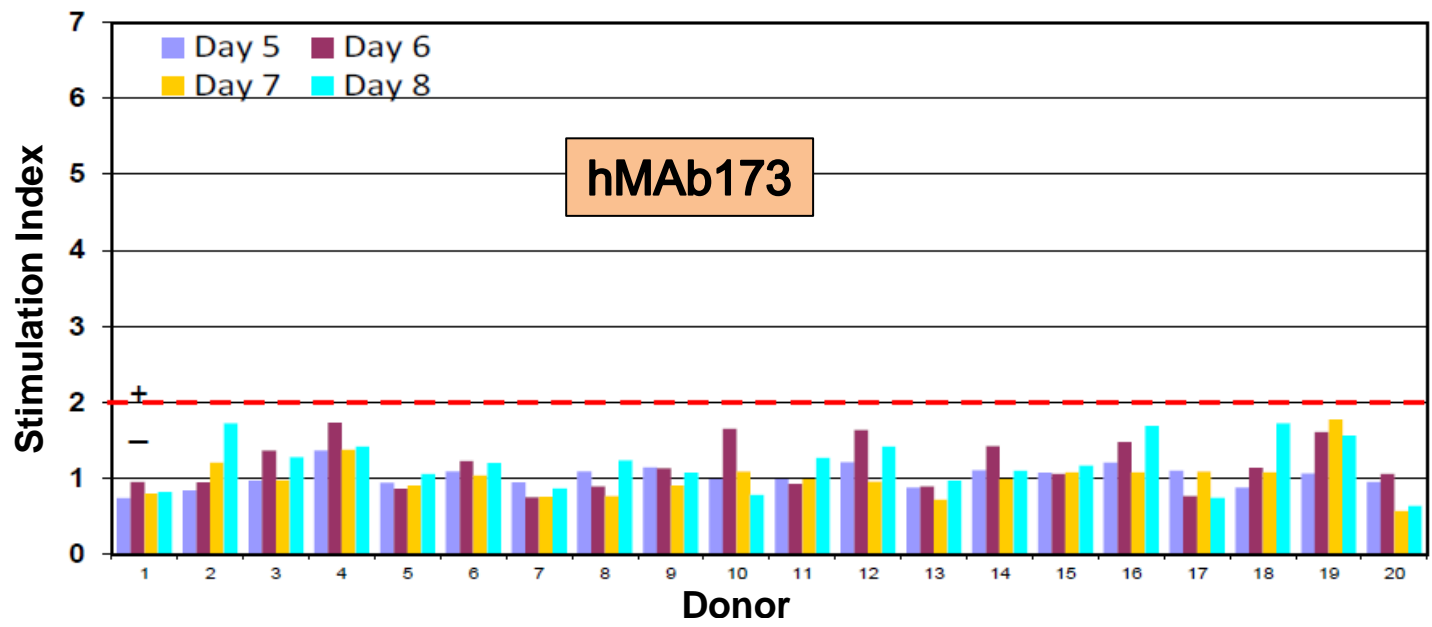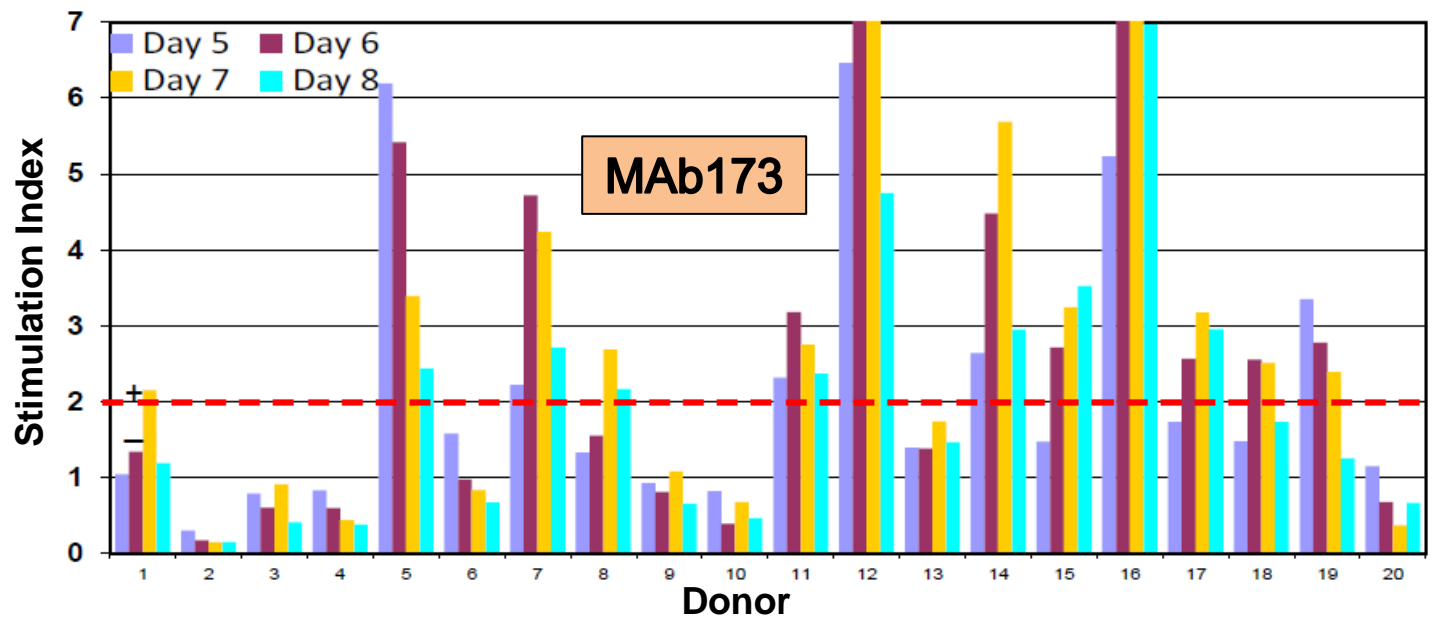

Supplement: bjc2015237x1.pdf [file bjc2015237x1.pdf]
